# How human runners regulate footsteps on uneven terrain

Nihav Dhawale<sup>1,2</sup> and Madhusudhan Venkadesan<sup>1</sup>

<sup>1</sup>*Department of Mechanical Engineering & Materials Science, Yale University, USA*

<sup>2</sup>*National Centre for Biological Sciences, Tata Institute of Fundamental Research, India*

## 1 Abstract

2 Running stably on uneven natural terrain takes skillful control and was critical for human evolution.  
3 Even as runners circumnavigate hazardous obstacles such as steep drops, they must contend with  
4 uneven ground that is gentler but still destabilizing. We do not know how footsteps are guided based on  
5 the uneven topography of the ground and how those choices influence stability. Therefore, we studied  
6 human runners on trail-like undulating uneven terrain and measured their energetics, kinematics, ground  
7 forces, and stepping patterns. We find that runners do not selectively step on more level ground areas.  
8 Instead, the body's mechanical response, mediated by the control of leg compliance, helps maintain  
9 stability without requiring precise regulation of footsteps. Furthermore, their overall kinematics and  
10 energy consumption on uneven terrain showed little change from flat ground. These findings may  
11 explain how runners remain stable on natural terrain while devoting attention to tasks besides guiding  
12 footsteps.

## 13 1 Introduction

14 Running on natural terrain is an evolutionarily important human ability (Carrier, 1984; Bramble  
15 and Lieberman, 2004), which requires the skillful negotiation of uneven ground (Lee and Lishman,  
16 1977; Warren Jr et al., 1986). Part of the challenge is planning a path in real-time that navigates  
17 around obstacles or sudden steep drops. Even after finding a path around such hazards, the ground  
18 would be uneven. Planning the stepping pattern using detailed information of every bump and  
19 dip of the ground is typically infeasible on natural trails because the ground is often covered by  
20 foliage or grass. But the seemingly slight unevenness, albeit gentler than large obstacles or drops,  
21 could have significant consequences to stability. Mathematical modeling predicts that even slightly  
22 uneven ground, with peak-to-valley height variations less than the dorso-plantar foot height, could  
23 be severely destabilizing unless some form of mitigation strategy is employed to deal with them  
24 (Dhawale et al., 2019). In this paper, we investigate how human runners deal with these types of  
25 undulating uneven ground.

26 Studies on human walking find that footsteps are visually guided to plan a path through com-  
27 plex, uneven terrain (Matthis et al., 2018; Thomas et al., 2020; Bonnen et al., 2021). Although  
28 there are no similar studies of running on naturalistic uneven terrain, we may expect that vision’s  
29 role is multifold. For example, in the evolutionary context of persistence hunting (Carrier, 1984;  
30 Bramble and Lieberman, 2004), vision is needed to track footprints and continuously survey the  
31 landscape for prey in addition to dealing with the terrain’s unevenness. The potentially competing  
32 demands on visual attention—for stability versus other functional goals—is probably more exacting  
33 in running than in walking because of the greater speeds involved and the shorter time available to  
34 sense and act. Additional important factors to consider on uneven terrain include dynamic stability  
35 (Holmes et al., 2006; Dhawale et al., 2019; Daley and Biewener, 2006; Voloshina and Ferris, 2015),  
36 leg safety (Birn-Jeffery et al., 2014), peak force mitigation (Blum et al., 2014), and anticipatory leg  
37 adjustments (Birn-Jeffery and Daley, 2012; Müller et al., 2015). However, we presently lack studies  
38 of human runners on naturalistic uneven terrain to investigate the role of vision-guided footstep  
39 regulation and the subtle regulation of body mechanics for maintaining stability, which motivates  
40 the overground running experiments presented in this paper.

41 In addition to vision, the body’s mechanical responses aid stability and are neurally modulated  
42 through muscle contractions. These mechanical properties have been studied theoretically, and  
43 experimental data have been interpreted, through the lens of models that approximate the runner  
44 as a point-like mass on a massless leg, commonly referred to as the spring-legged inverted pendulum  
45 (SLIP) model (Seyfarth et al., 2002; Daley et al., 2006; Geyer et al., 2006; Birn-Jeffery et al.,  
46 2014; Müller et al., 2016; Seethapathi and Srinivasan, 2019). SLIP models have hypothesized  
47 multiple stabilization strategies for terrain with random height variations, several of which have  
48 found experimental support: higher leg retraction rates (Karszen et al., 2015), wider lateral foot  
49 placement (Voloshina and Ferris, 2015; Mahaki et al., 2019), and the possible use of vision to  
50 guide foot placement (Birn-Jeffery and Daley, 2012). But SLIP models do not help understand the  
51 effect of slope variations because the ground force is constrained to always point to the center of  
52 mass irrespective of whether the foot contacts the ground on a level or sloping region. That is a  
53 consequence of the zero moment of inertia about the center of mass for SLIP models. Analyses of  
54 models with non-zero moment of inertia show that both height and slope variations are detrimental  
55 to stability, with slope being more destabilizing (Dhawale et al., 2019), reminiscent of common

56 experience among runners.

57 Understanding why slope variations degrade stability could generate hypotheses and testable  
58 predictions for how human runners deal with stability on naturalistic uneven terrain. The mathe-  
59 matical analyses of Dhawale et al. (2019) find that random variations in slope lead to step-to-step  
60 fluctuations in the fore-aft ground impulse. For steady forward running, the net forward impulse  
61 should be zero for every step. But small step-to-step random variation of the fore-aft ground  
62 impulse leads to a gradual accumulation of sagittal plane angular momentum, which ultimately  
63 destabilizes the runner. However, the rate at which the destabilizing angular momentum builds  
64 up depends on where on the terrain the foot lands and how the body responds to landing on  
65 the ground, thus suggesting two mitigating strategies. One strategy is to minimize the fore-aft  
66 impulse that is experienced at touch down, which has the effect of significantly slowing down the  
67 fluctuation-induced build-up of destabilizing angular momentum. This can be achieved by reducing  
68 the forward speed of the foot at touchdown via leg retraction and by reducing limb compliance so  
69 that the momentum of the rest of the body contributes lesser to the fore-aft impulse. Another  
70 strategy is to try and land primarily on local maxima or other flat regions of the terrain so that  
71 the destabilizing influence of random slope variations is reduced. The experimental assessment of  
72 these two strategies is the topic of this paper.

73 Most past experimental studies of uneven terrain running have used step-like blocks to show  
74 how humans and animals deal with height variations on the ground (Daley et al., 2006; Müller et al.,  
75 2015). Later work modified the terrain design to use blocks that were narrow enough so that the  
76 foot had to span more than one fore-aft block, leading the foot to be randomly tilted during foot flat  
77 (Voloshina and Ferris, 2015). Specifically, the blocks were of three different heights (labeled A, B,  
78 and C), which leads to six possible height difference pairings (AB, BA, AC, CA, BC, CB). In natural  
79 terrain, the variation in slope is continuously graded, which would allow for more variation in the  
80 foot flat angle. Moreover, as hypothesized by theoretical analysis (Dhawale et al., 2019), it is not  
81 only the foot angle that affects whole body dynamics, but the force direction from the ground also  
82 matters. In this regard, the natural terrain may differ from the block design, particularly during  
83 initial contact and push-off when only a small region of the foot makes contact with the ground.  
84 During that time, the block design would not influence the ground forces like the sloped ground  
85 of natural undulating terrain would. Moreover, complex terrain types may be required to capture

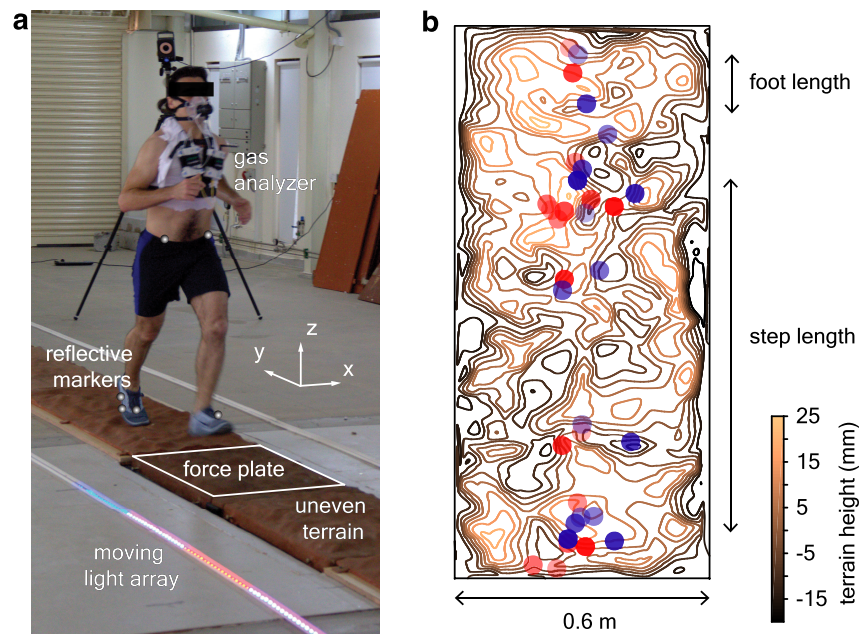

**Fig. 1. Uneven terrain experiments.** **a**, We conducted human-subject experiments on flat and uneven terrain while recording biomechanical and metabolic data. The reflective markers and the outline of the force plate are digitally exaggerated for clarity. **b**, Footsteps were recorded to determine whether terrain geometry influences stepping location, illustrated here by a mean-subtracted contour plot of terrain height for an approximately 6 foot segment of uneven II overlaid with footsteps (location of the heel marker). Blue and red circles represent opposite directions of travel and transparency level differentiates trials.

86 the range of strategies used to run on naturalistic uneven terrain. This is suggested by studies that  
87 examine walking on a variety of outdoor terrain and show that stride variability and energetics  
88 significantly depend on terrain complexity (Kowalsky et al., 2021). Undulating uneven terrain have  
89 been studied in the context of walking (Kent et al., 2019; Kowalsky et al., 2021), but not running.  
90 So there is a need for experiments to study running on undulating terrain with continuously varying  
91 slopes to expand the current understanding of how uneven terrain affects stability. In this paper we  
92 experimentally assess foot placement patterns, fore-aft ground impulses, stepping kinematics, and  
93 metabolic power consumption on undulating uneven terrain whose unevenness is akin to running  
94 trails (Fig. 1).

## 95 2 Methods

### 96 2.1 Protocol and experimental measurements

97 We conducted overground running experiments with 9 subjects (8 men, 1 woman; age 23–45 years,  
98 body mass  $66.1 \pm 8.5$  kg, leg length  $0.89 \pm 0.04$  m, reported as mean  $\pm$  SD). All subjects were able-  
99 bodied, ran approximately 30 km per week, and had run at least one half-marathon or marathon  
100 within the previous year. Experiments were conducted at the National Centre for Biological Sci-  
101 ences, Bangalore, India with informed consent from the volunteers, and IRB approval.

102 Subjects ran back-and-forth on three 24 m long and 0.6 m wide tracks (Fig. 2a). In addition to a  
103 *flat* track, we used two custom-made uneven tracks, *uneven I* and *uneven II*, which had increasing  
104 unevenness. Uneven I and uneven II had peak-to-valley height differences (amplitude) of  $18 \pm 6$  mm  
105 and  $28 \pm 11$  mm (mean  $\pm$  SD), respectively, and peak-to-peak horizontal separation (wavelength) of  
106  $102 \pm 45$  mm and  $108 \pm 52$  mm, respectively (Fig. 2b,c,d). We recorded kinematics using an 8-camera  
107 motion capture system (Vicon Inc., Oxford, UK) at 300 frames per second and measured the ground  
108 reaction forces at 600 Hz using two force plates (AMTI Inc., model BP600900) embedded beneath  
109 the center of the track. The cameras recorded an approximately 10 m long segment of the center  
110 of the track. Breath-by-breath respirometry was also recorded by a mobile gas analyzer (Oxycon  
111 Mobile<sup>TM</sup>, CareFusion Inc.).

112 A single trial consisted of a 3 minute period of standing when the resting metabolic rate was  
113 recorded followed by subjects running back-and-forth on the track for at least 8 minutes and up to  
114 10 minutes, dictated by  $VO_2$  reading equilibration time and the subject's ability to maintain speed  
115 over the course of the trial. Each subject ran on all three terrains, with the order randomized. We  
116 controlled the running speed using a moving light array in 24 m long LED strips laid on either side  
117 of the track (Fig. 2a). Subjects were instructed to stay within the bounds of a 3 m illuminated  
118 segment of the LED strip that traveled at 3 m/s. This speed was chosen as it was comfortable for all  
119 subjects and lies within the endurance running speed range for humans (Bramble and Lieberman,  
120 2004). Running speed fluctuated within a trial, however mean speed as well as speed variability were  
121 consistent across terrain types (see results for details). Subjects were provided with standardized,  
122 commercially available running shoes.

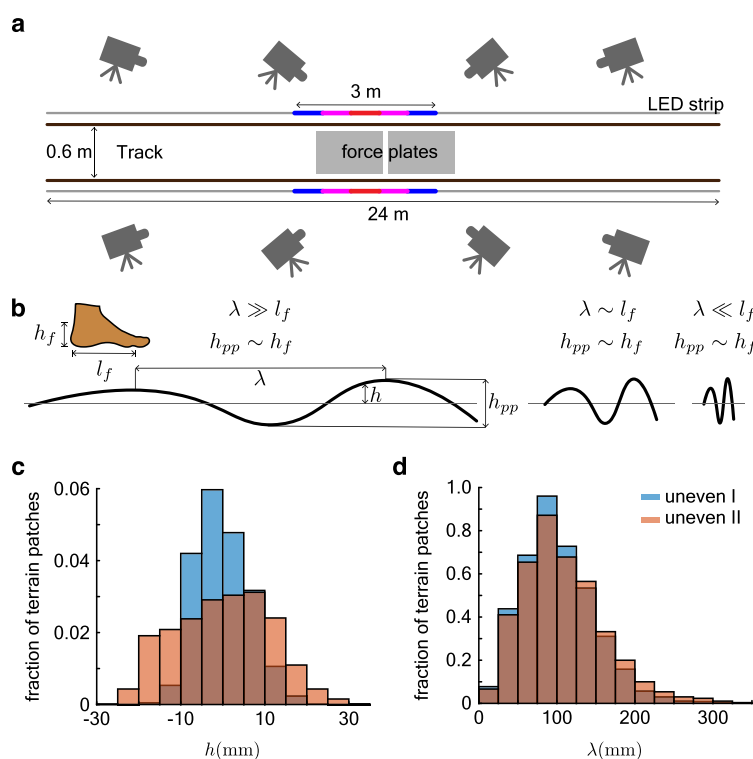

**Fig. 2. Details of the experiment design.** **a**, Schematic of the running track, camera placement, force plate positions and the LED strip with a 3 m illuminated section. **b**, The terrain was designed so that the range of its height distribution  $h$  was comparable to ankle height  $h_{pp} \sim h_f$  and peak-to-peak distances  $\lambda$  (along the length of the track) were comparable to foot length  $\lambda \sim l_f$ . **c**, Histograms of the mean subtracted heights  $h$  of the uneven terrain. **d**, Histograms of the peak-to-peak separation  $\lambda$  of the uneven terrain.

### 123 2.1.1 Uneven terrain

124 Terrain unevenness was heuristically specified so that peak-to-valley height variations were approx-  
 125 imately equal to the height of the malleolus while standing barefoot on level ground, and peak-to-  
 126 peak horizontal distances were similar to foot length (Fig. 2b). Large terrain height variations may  
 127 elicit obstacle avoidance strategies, which is not the subject of this paper, and peak-to-peak hori-  
 128 zontal separation longer than the step length may make the slope variation too gentle. Conversely,  
 129 small height variations that are similar to the heel pad thickness, and peak-to-peak horizontal sep-  
 130 aration that is smaller than the foot length, will likely be smoothed out by foot and sole compliance  
 131 (Venkadesan et al., 2017).

132 The uneven terrains were constructed by Mars Adventures Inc. (Bangalore, India) by laying fiber  
 133 glass over heuristically created contours. Epoxy was used to harden the fiber glass sheets into a stiff

134 shell which was coated with a slurry of sand and epoxy to create a surface that texturally resembles  
135 weathered rock. The width at the ends of the uneven track were broadened to approximately 1 m to  
136 allow for runners to change direction while remaining on the terrain. The terrain was then digitized  
137 using a dense arrangement of reflective markers that were recorded by the motion capture system.

### 138 **2.1.2 Kinematics**

139 Foot kinematics were recorded using fiducial markers that were fixed to the shoes over the calcaneus,  
140 second distal metatarsal head, and below the lateral malleolus. Markers were attached to the hip,  
141 over the left and right lateral superior iliac spine, and the left and right posterior superior iliac  
142 spine. The mean position of the hip markers was used to estimate the center of mass location.

143 Stance was defined as when the heel marker's forward velocity was minimized and its height  
144 was within 15 mm of the marker's height during standing. The threshold of 15 mm was chosen to  
145 account for terrain height variations so that stance may be detected even when the heel lands on  
146 a local peak of the uneven terrain.

147 The center of mass forward speed  $v = d_{\text{step}}/t_{\text{step}}$  was found from the distance  $d_{\text{step}}$  covered by  
148 the center of mass in the time duration  $t_{\text{step}}$  between consecutive touchdown events. Leg angle at  
149 touchdown was defined as the angle between the vertical and the line formed by joining the heel  
150 marker to the center of mass. Virtual leg length at touchdown is defined as the distance between  
151 the heel marker and the center of mass. Foot length  $l_f$  is defined as the average distance in the  
152 horizontal plane between the toe and heel marker, across all subjects. The center of mass trajectory  
153 during stance was fitted with a regression line in the horizontal plane. The step width was found as  
154 twice the distance of nearest approach of the stance foot from the regression line. This definition  
155 allows for the runner's center of mass trajectory to deviate while preserving a definition of step  
156 width that is consistent with those previously used (Donelan et al., 2001; Arellano and Kram,  
157 2011). We estimated meander, i.e. the deviation of the center of mass from a straight trajectory,  
158 using  $(d - d_0)/d_0$ , where  $d$  is the distance covered by the center of mass in the horizontal plane  
159 during a single run across the length of the track and  $d_0$  is the length of the straight-line fit to the  
160 center of mass trajectory. Foot velocity or center of mass velocity at landing were calculated by  
161 fitting a cubic polynomial to the heel marker trajectory or center of mass trajectory, respectively,  
162 in a 100 ms window before touchdown, and calculating the time derivative of the fitted polynomial



163 at the moment just prior to touchdown. Leg retraction rate  $\omega$  is determined using  $\omega = v_f / \|\mathbf{l}\|$ ,  
164 where  $v_f$  is the component of the foot's relative velocity with respect to the center of mass that is  
165 perpendicular to the virtual leg vector  $\mathbf{l}$  (vector joining heel to center of mass).

166 Step width, step length and virtual leg length at touchdown are normalized by the subject's leg  
167 length, defined as the distance between the greater trochanter and lateral malleolus.

168 To correct for slight angular misalignments between the motion capture reference frame and  
169 the long axis of the running track, we align the average CoM trajectory over the entire track length  
170 to be parallel to the y-axis of the motion capture reference frame. This correction reflects the  
171 experimental observation that the subjects run along the center of the track.

### 172 **2.1.3 Kinetics**

173 Force plate data were low-pass filtered using an 8<sup>th</sup> order, zero-phase, Butterworth filter with a  
174 cut-off frequency of 270 Hz. Touchdown on the force plates was defined by a threshold for the  
175 vertical force of four standard deviations above the mean unloaded baseline reading.

176 The forward collision impulse, defined as the maximal decelerating fore-aft impulse  $J_y^*$ , was  
177 found by integrating the fore-aft component  $F_y$  of the ground reaction force during the deceleration  
178 phase as

$$179 \quad J_y^* = \max_t \left| \int_0^t F_y(\tau) d\tau \right|. \quad (1)$$

180 We normalized  $J_y^*$  by the aerial phase forward momentum  $mv_y$ , where  $v_y$  is the forward speed of  
181 the center of mass during the aerial phase.

### 182 **2.1.4 Energetics**

183 Net metabolic rate is defined as the resting metabolic power consumption subtracted from the power  
184 consumption during running and normalized by the runner's mass. Metabolic power consumption  
185 is determined using measurements of the rate of O<sub>2</sub> consumption and CO<sub>2</sub> consumption using  
186 formulae from Brockway (Brockway, 1987). For running, this is calculated after discarding the first  
187 3 minutes of the run to eliminate the effect of transients. The resting metabolic power consumption  
188 is calculated after discarding the first minute of the standing period of the trial. Data from each  
189 trial were visually inspected to ensure that the rates of O<sub>2</sub> consumption and CO<sub>2</sub> production had  
190 reached a steady state, seen as a plateau in the data trace.



### 191 **2.1.5 Shuttle running**

192 Of the total track length of 24 m, a 1.2 m turnaround segment was designed at each end to facilitate  
193 the subjects to reverse their running direction without stepping off the track. These end segments  
194 were 1 m wide, which was broader than the rest of the track that was only 0.6 m wide. The runners  
195 would reach the end of the track and turn around promptly. Guiding light bars that controlled the  
196 running speed would be half “absorbed” into the end before reversing direction, which allowed for  
197 sufficient time for the subjects to turn around while still maintaining the same average speed. The  
198 subjects were given, and took, around 0.5 s to turn around. The subjects ran at a steady speed  
199 within the capture volume that covers the middle 10 m of the track (see results for details). The  
200 cameras could not capture the ends of the track but the experimenters observed that the subjects  
201 stayed within the moving light bar through the 21.6 m long straight portion of the track. The  
202 experimental protocol used in this study was tuned through pilot trials involving the authors of  
203 this manuscript and 2 initial subjects. The data from these pilot trial subjects are not part of the  
204 reported results in this manuscript.

## 205 **2.2 Foot stepping analysis**

### 206 **2.2.1 Directed foot placement scheme**

207 The runners’ foot landing locations were compared to a Markov chain Monte Carlo model which  
208 finds stepping locations with the lowest terrain unevenness subject to constraints of matching  
209 experimentally measured stepping kinematics. All participants were heel-strike runners on all  
210 terrain types, as judged from the double peak in the vertical ground reaction force profile. Therefore,  
211 the stepping model sampled the terrain in rear-foot sized patches, which we define to be 95 mm ×  
212 95 mm (dimensions are chosen to be half the size of the foot length, 190 mm). The interquartile  
213 range of heights ( $h_{IQR}$ ) in each patch was used as a measure of its unevenness.

214 Starting from an initial position  $(x_i, y_i)$ , the model takes the next step to  $(x_{i+1}, y_{i+1})$  in the

215 following stages: *open-loop stage*, *minimization stage*, and a *noise process* given by,

216 open-loop stage:  $\hat{x}_{i+1} = x_i + (-1)^i s_w, \hat{y}_{i+1} = y_i + (-1)^j s_l.$  (2)

217 minimization stage:  $(x'_{i+1}, y'_{i+1}) = \arg \min_{(x,y)} t(x, y),$  (3)

218  $x \in [\hat{x}_{i+1} - \sigma_{sw}, \hat{x}_{i+1} + \sigma_{sw}],$

219  $y \in [\hat{y}_{i+1} - \sigma_{sl}, \hat{y}_{i+1} + \sigma_{sl}].$

220 noise process:  $x_{i+1} = x'_{i+1} + \eta_x, y_{i+1} = y'_{i+1} + \eta_y,$  (4)

221 where  $\eta_x \sim v_M(1, 0, \sigma_{sw}), \eta_y \sim v_M(1, 0, \sigma_{sl}).$

222 In the open-loop stage, the model takes a step forward and sideways dictated by the experimentally  
223 measured mean step length  $s_l$  and mean step width  $s_w$ , respectively. The exponent  $j$  is either 0  
224 or 1 and keeps track of the direction of travel. The function  $t(x, y)$  evaluates the interquartile  
225 range of heights of a rear-foot sized patch centered around position  $(x, y)$ . In the minimization  
226 step, the model conducts a bounded search about  $(\hat{x}_{i+1}, \hat{y}_{i+1})$  for the location that minimizes  
227  $t(x, y)$ . The search region is defined by the standard deviations of the measured step width  $\sigma_{sw}$   
228 and step length  $\sigma_{sl}$ . To perform the minimization, a moving rear-foot sized window with step-sizes  
229 of  $\sigma_{sw}/10$  along the width of the track and  $\sigma_{sl}/10$  along its length are used to evaluate  $t(x, y)$   
230 at various candidate stepping locations within the search region. The step-sizes for translating  
231 the moving window were chosen because they were much smaller than typical terrain features and  
232 thus the landing location with the lowest unevenness  $(x'_{i+1}, y'_{i+1})$  was determined by the terrain  
233 properties, not model parameters. To simulate sensorimotor noise, the location of this minimum  
234  $(x'_{i+1}, y'_{i+1})$  is perturbed by random variables  $\eta_x, \eta_y$ . The random variables are drawn from von  
235 Mises distributions with  $\kappa = 1$ , centered about zero, and scaled so that the base of support for the  
236 distributions are  $\sigma_{sw}$  and  $\sigma_{sl}$ , respectively.

237 At the ends of the track, the  $x$  position of the runner is reset so that the runner is at the center  
238 of the track, and the direction of travel is reversed ( $j$  value is toggled). We simulate for 100,000  
239 steps to ensure that reported terrain statistics at footstep locations as well as step length and step  
240 width converge, i.e. errors between simulations in these parameters are less than 1% of their mean  
241 value.

242 **2.2.2 Quantifying foot placement patterns**

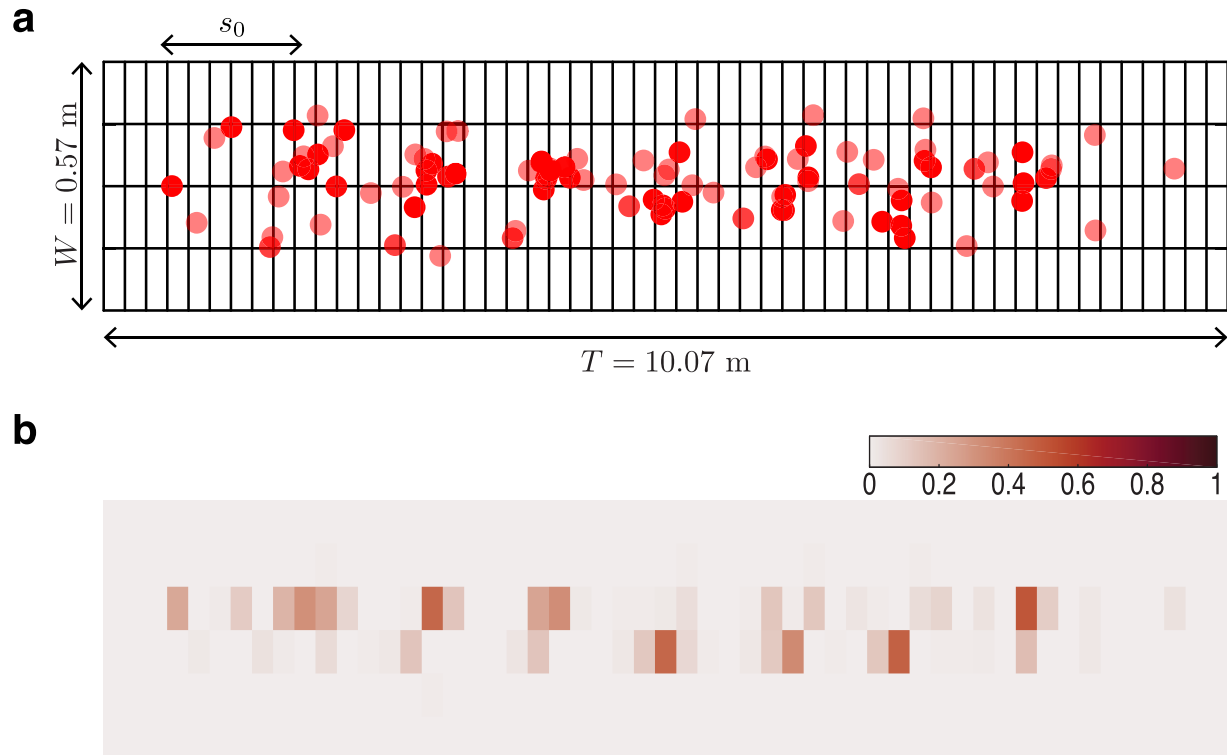

**Fig. 3.** Foot placement analysis. **a**, Red circles denote footstep locations (392 footsteps) in the ‘ $x - y$ ’ plane for a representative trial on uneven II. The grid spacing is 190 mm along the length of the track and 95 mm along its width. Step length  $s_0$  is shown for reference.  $T$  is the length of the capture volume and  $W$  is the width of the track. Note that the  $x$  and  $y$  axes of this figure are not to the same scale. **b**, The probability of landing on a foot-sized region of the track is quantified by the foot placement index equation (5) shown as a heatmap with the color bar at the top left.

243 We used a second analysis of footstep patterns that correlated the foot landing probability with  
244 terrain unevenness. To perform this analysis, we define a foot placement index to estimate the  
245 probability that the runner’s foot lands within a foot-sized patch of the track. To calculate this  
246 index, we first divide the terrain into a grid of 0.5 foot lengths  $\times$  1.0 foot lengths cells, with the  
247 longer side of the cell along the length of the track (Fig. 3a). We count the number of footsteps  $f_{i,j}$   
248 in each cell  $c_{i,j}$ , where  $i$  indexes the position of the cell along the length of the track and  $j$  indexes  
249 the position of cell transverse to the track. The point of landing is determined by the location  
250 of the heel marker. Even if the fore-foot crosses over the adjacent cell boundary, the location  
251 of the heel marker uniquely specifies the landing cell identity. We also define step length-sized  
252 neighborhoods that contain cell  $c_{i,j}$  which are one step-length long and as wide as the track. Each

253 such neighborhood has a cumulative footstep count  $S_i$  that depends on the longitudinal location  $i$   
254 of the cell. The average across all such step length-sized neighborhoods that contain cell  $c_{i,j}$  is  $S$ .  
255 This average  $S$  is used to normalize each  $f_{i,j}$  to yield the foot placement index  $p_{i,j}$  according to,

$$256 \quad p_{i,j} = \frac{f_{i,j}}{S}. \quad (5)$$

257 The index  $p_{i,j}$  measures the fraction of times a foot lands in cell  $c_{i,j}$  compared to all other cells  
258 that are within a step length distance of it (Fig. 3b). If runners were perfectly periodic with no  
259 variation in footstep location from one run over the terrain to the next,  $p_{i,j} = 1$  for cells on which  
260 subjects stepped and  $p_{i,j} = 0$  otherwise. If, however, stepping location was the result of a uniform  
261 random process,  $p_{i,j}$  would be a constant for every cell of the terrain and equal to the reciprocal  
262 of the number of cells in a step-length sized box. Heat maps of the foot placement index  $p_{i,j}$  are  
263 shown in Fig. 3—figure supplement 1. We report the total number of footsteps recorded for each  
264 trial in Fig. 3—table supplement 1.

265 To probe foot placement strategies we determine whether the foot placement index  $p_{i,j}$  cor-  
266 relates with the median height or the interquartile range of heights within the cell  $c_{i,j}$ . Positive  
267 correlation with the median height would indicate stepping on local maxima that are flatter than  
268 the surrounding, and negative correlation with the interquartile range would indicate stepping on  
269 flatter regions with more uniform height. We test this hypothesis through the use of a statistical  
270 model described in section 2.4.2.

### 271 **2.3 Collision model**

272 To delineate the relative contributions of joint stiffness and forward foot speed to the fore-aft  
273 impulse, we model the impulse due to the foot-ground interaction. In the model, a planar three-  
274 link chain represents the foot, shank, and thigh, and a fourth link represents the torso. Following  
275 Dempster (1955), all masses and lengths are expressed as fractions of the body mass and leg length,  
276 respectively. This model builds upon the leg collision model of Lieberman et al. (2010), by including  
277 additional segments representing the thigh and torso and calculating the fore-aft collisional impulse.  
278 The collision is assumed to be instantaneous and inelastic, with a point-contact between the leg  
279 and the ground. Such collision models are widely used to capture the stance impulse due to ground

280 forces in walking (Donelan et al., 2002; Ruina et al., 2005) and running (Srinivasan and Ruina,  
281 2006; Dhawale et al., 2019). Because the collision is assumed to be instantaneous, only infinite  
282 forces contribute to the impulse (Chatterjee and Ruina, 1998; Lieberman et al., 2010). Therefore,  
283 to investigate the effect of joint compliance, we model the hinge joints connecting the links as either  
284 infinitely compliant or perfectly rigid. The advantage of these contact models is their ability to  
285 accurately capture the impulse without the numerous additional parameters needed to represent  
286 the complete force-time history when contact occurs between two bodies (Chatterjee and Ruina,  
287 1998).

288 We use experimental data on center of mass velocity and leg retraction rate just prior to landing,  
289 along with the leg angle at touchdown, to compute a predicted collisional impulse. Because all  
290 our runner's were heel-strikers, we use foot-strike index  $s = 0.15$  for the collision calculations  
291 (Lieberman et al., 2010). The foot-strike index ranges from 0 for heel strikes to 1 for forefoot  
292 strikes and encodes the runner's foot strike pattern. The ratio of the collisional impulse to the  
293 measured whole body momentum just prior to landing is calculated for the model at the two  
294 joint stiffness extremes and compared with experimental measurements of the normalized fore-aft  
295 impulse. By analyzing the collisional impulse for these two extremes of joint stiffness, we isolate  
296 the contributions to the fore-aft impulse arising from varying the joint stiffness versus varying the  
297 forward foot speed at landing.

298 **Notation:** Notation used in this section is as follows. Scalars are denoted by italic symbols (e.g.  $I$   
299 for the moment of inertia), vectors by bold, italic symbols ( $\mathbf{v}$  for velocity), and points or landmarks  
300 in capitalized non-italic symbols (such as center of mass  $G$  in Fig. 4a). Vectors associated with a  
301 point, such as the velocity of center of mass  $G$  are written as  $\mathbf{v}_G$ , with the upper-case alphabet in  
302 the subscript specifying the point in the plane. Moment of inertia variables are subscripted with  
303 '/A' representing the moment of inertia computed about point A, such as  $I_G$  representing the  
304 moment of inertia about the center of mass  $G$ . Position vectors are denoted by  $\mathbf{r}_{A/B}$  which denotes  
305 the position of point A with respect to point B. Variables just before the collision with the terrain  
306 are denoted by the superscript '-', and just after the collision by the superscript '+'. Equations  
307 with variables that have no superscript apply throughout stance.

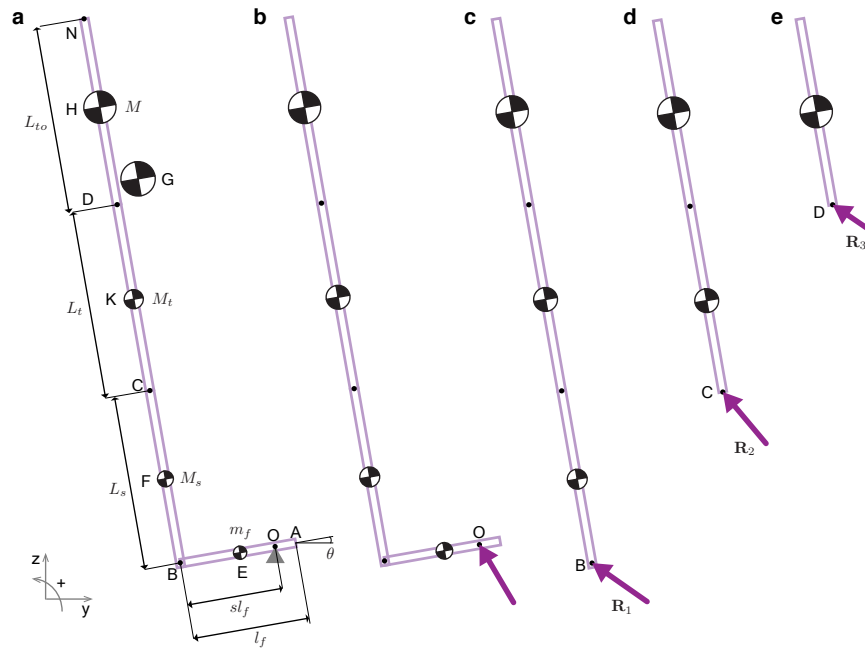

**Fig. 4.** Model for estimating fore-aft collision impulses from kinematic data. **a**, A four link model of the foot (A-B), shank (B-C), thigh (C-D), and torso (D-N) moving with center of mass velocity  $\mathbf{v}_G^-$  and angular velocity  $\mathbf{\Omega}^-$  collides with the ground at angle  $\theta$ . G represents the center of mass. Leg length and body mass are obtained from data and scaled according to Dempster (Dempster, 1955) to obtain segment lengths and masses. Free-body diagrams show all non-zero external impulses: **b**, collisional impulse  $\mathbf{J}$  acting at O, and panels **c**, **d**, **e**, show reaction impulses  $\mathbf{R}_1$ ,  $\mathbf{R}_2$ , and  $\mathbf{R}_3$  acting at B, C, and D respectively.

308 **Rigid Joints:** Consider the L-shaped bar (Fig. 4a) falling with velocity  $\mathbf{v}_G^- = v_y^- \hat{j} + v_z^- \hat{k}$  and angular  
 309 velocity  $\mathbf{\Omega}^- = \omega^- \hat{i}$ . Upon contact with the ground, the point O on the foot instantly comes to rest  
 310 and the center of mass translational and angular velocities change to  $\mathbf{v}_G^+ = v_y^+ \hat{j} + v_z^+ \hat{k}$ ,  $\mathbf{\Omega}^+ = \omega^+ \hat{i}$ .  
 311 Due to the instantaneous collision assumption, finite forces like the gravitational force do not  
 312 contribute to the collisional impulse, and the ground reaction force at point O leads to the impulse  
 313  $\mathbf{J}$  (Fig. 4b). Angular momentum balance about the contact point O yields the relationship between  
 314 pre and post collision velocities,

$$M_b \mathbf{r}_{G/O} \times \mathbf{v}_G^- + I/G \mathbf{\Omega}^- = M_b \mathbf{r}_{G/O} \times \mathbf{v}_G^+ + I/G \mathbf{\Omega}^+, \quad (6a)$$

$$\mathbf{v}_G = \mathbf{v}_O + \mathbf{\Omega} \times \mathbf{r}_{G/O}, \quad (6b)$$

$$\text{where } \mathbf{v}_O^+ = 0. \quad (6c)$$

315 The total mass  $M_b$  is the sum of the masses of the torso  $M$ , thigh  $M_t$ , shank  $M_s$ , and foot  $m_f$ .  
316 We solve for  $\omega^+$  in equation (6) and obtain the post-collision center of mass velocity  $\mathbf{v}_G^+$  using  
317 equation 6b. From this, the collision impulse  $\mathbf{J}$  and the normalized fore-aft collisional impulse  
318  $|J_y^*|/J_b$  are calculated using,

$$\mathbf{J} = M_b(\mathbf{v}_G^+ - \mathbf{v}_G^-), \quad (7a)$$

$$J_y^* = \mathbf{J} \cdot \hat{j}, \quad (7b)$$

$$\text{and } J_b = M_b(\mathbf{v}_G^- \cdot \hat{j}). \quad (7c)$$

319 **Compliant joints:** If the L-bar has compliant joints, then the post-collision velocities for each  
320 segment may vary. Therefore, we write additional angular momentum balance equations for each  
321 segment to solve for the post-collision state. Since the only non-zero external impulse acting on  
322 the shank, thigh, and torso segments is the reaction impulse  $\mathbf{R}_1$  acting at B (Fig. 4c), the only  
323 non-zero external impulse on the thigh and torso portion of the leg is the reaction impulse  $\mathbf{R}_2$   
324 acting at C (Fig. 4d), and the only non-zero external impulse acting on the torso portion of the leg  
325 is the reaction impulse  $\mathbf{R}_3$  acting at D (Fig. 4e), we write angular momentum balance equations



326 for the entire body and these three segments as,

$$\begin{aligned}
 M_b \mathbf{r}_{G/O} \times \mathbf{v}_G^- + I_G \boldsymbol{\Omega}^- &= m_f \mathbf{r}_{E/O} \times \mathbf{v}_E^+ + I_E \boldsymbol{\Omega}_E^+ + \\
 &M_s \mathbf{r}_{F/O} \times \mathbf{v}_F^+ + I_F \boldsymbol{\Omega}_F^+ + \\
 &M_t \mathbf{r}_{K/O} \times \mathbf{v}_K^+ + I_K \boldsymbol{\Omega}_K^+ + \\
 &M \mathbf{r}_{H/O} \times \mathbf{v}_H^+ + I_H \boldsymbol{\Omega}_H^+,
 \end{aligned} \tag{8a}$$

$$\begin{aligned}
 M_s \mathbf{r}_{F/B} \times \mathbf{v}_F^- + M_t \mathbf{r}_{K/B} \times \mathbf{v}_K^- + \\
 M \mathbf{r}_{H/B} \times \mathbf{v}_H^- + (I_F + I_K + I_H) \boldsymbol{\Omega}^- &= M_s \mathbf{r}_{F/B} \times \mathbf{v}_F^+ + I_F \boldsymbol{\Omega}_F^+ + \\
 &M_t \mathbf{r}_{K/B} \times \mathbf{v}_K^+ + I_K \boldsymbol{\Omega}_K^+ + \\
 &M \mathbf{r}_{H/B} \times \mathbf{v}_H^+ + I_H \boldsymbol{\Omega}_H^+,
 \end{aligned} \tag{8b}$$

$$\begin{aligned}
 M_t \mathbf{r}_{K/C} \times \mathbf{v}_K^- + M \mathbf{r}_{H/C} \times \mathbf{v}_H^- + \\
 (I_K + I_H) \boldsymbol{\Omega}^- &= M_t \mathbf{r}_{K/C} \times \mathbf{v}_K^+ + I_K \boldsymbol{\Omega}_K^+ + \\
 &M \mathbf{r}_{H/C} \times \mathbf{v}_H^+ + I_H \boldsymbol{\Omega}_H^+,
 \end{aligned} \tag{8c}$$

$$M \mathbf{r}_{H/D} \times \mathbf{v}_H^- + I_H \boldsymbol{\Omega}^- = M \mathbf{r}_{H/D} \times \mathbf{v}_H^+ + I_H \boldsymbol{\Omega}_H^+ \tag{8d}$$

327 where  $I_E, I_F, I_K, I_H$  are moments of inertia of the foot, shank, thigh, and torso segments, respec-  
 328 tively about their centres. The linear and angular velocities of the foot ( $\mathbf{v}_E, \boldsymbol{\Omega}_E$ ), shank ( $\mathbf{v}_F, \boldsymbol{\Omega}_F$ ),  
 329 thigh ( $\mathbf{v}_K, \boldsymbol{\Omega}_K$ ), and torso ( $\mathbf{v}_H, \boldsymbol{\Omega}_H$ ) are related to the velocity of the contact point O as,

$$\mathbf{v}_E = \mathbf{v}_O + \boldsymbol{\Omega}_E \times \mathbf{r}_{E/O}, \tag{9a}$$

$$\mathbf{v}_F = \mathbf{v}_O + \boldsymbol{\Omega}_E \times \mathbf{r}_{B/O} + \boldsymbol{\Omega}_F \times \mathbf{r}_{F/B}, \tag{9b}$$

$$\mathbf{v}_K = \mathbf{v}_O + \boldsymbol{\Omega}_E \times \mathbf{r}_{B/O} + \boldsymbol{\Omega}_F \times \mathbf{r}_{C/B} + \boldsymbol{\Omega}_K \times \mathbf{r}_{K/C}, \tag{9c}$$

$$\mathbf{v}_H = \mathbf{v}_O + \boldsymbol{\Omega}_E \times \mathbf{r}_{B/O} + \boldsymbol{\Omega}_F \times \mathbf{r}_{C/B} + \boldsymbol{\Omega}_K \times \mathbf{r}_{D/C} + \boldsymbol{\Omega}_H \times \mathbf{r}_{H/D}, \tag{9d}$$

$$\text{where } \mathbf{v}_O^- = \mathbf{v}_G^- + \boldsymbol{\Omega}^- \times \mathbf{r}_{O/G}, \tag{9e}$$

$$\text{and } \mathbf{v}_O^+ = 0. \tag{9f}$$

330 Simultaneously solving equations (8)-(9) yields the post-collision velocities for each segment of the  
 331 L-bar. From these, we calculate the normalized fore-aft collision impulse for the compliant model

332 using equation (7).

## 333 **2.4 Statistical methods**

### 334 **2.4.1 Sample size**

335 Sample size could refer to the number of subjects or the number of foot steps that were used in  
336 the analyses. The number of subjects recruited was informed by typical participant numbers that  
337 were used in similar past studies (Donelan et al., 2004; Voloshina and Ferris, 2015; Seethapathi  
338 and Srinivasan, 2019). There is an additional consideration for sufficiency of sample numbers for  
339 the foot placement analysis. The steps should densely sample the approximately 10 m long central  
340 region of the track, where the motion capture system was recording from. The 5262 recorded steps  
341 (2526 on uneven I, 2736 on uneven II) are sufficient to densely sample the measurement region  
342 assuming a rear-foot sized patch for each step.

### 343 **2.4.2 Statistical analysis and reporting**

344 Measures of central tendency (mean or median) and variability (standard deviation or interquartile  
345 range) of the distributions of step width, step length, center of mass speed, forward foot speed at  
346 landing, fore-aft impulse, virtual leg length at touchdown, leg angle at touchdown, net metabolic  
347 rate, and meander are reported for each trial.

348 We use three different linear mixed models to determine (a) whether gait variables vary with  
349 terrain type, (b) whether leg angle at touchdown and decelerating fore-aft impulses covary with  
350 forward foot speed at touchdown, and (c) whether the foot placement index  $p_{i,j}$  (equation (5))  
351 correlates with the median height or the interquartile range of heights within the terrain region  
352 at landing. The statistical models are run using the `lmerTest` package in R (Kuznetsova et al.,  
353 2017). We use a linear mixed-model fit by restricted maximum likelihood t-tests with Satterthwaite  
354 approximations to degrees of freedom. An ANOVA on the first model tests for the effect of the  
355 terrain factor, an ANCOVA on the second model tests for the effect of the terrain factor and the  
356 covariate forward foot speed, and an ANCOVA on the third model tests whether the probability of  
357 landing on a terrain patch  $p_{i,j}$  significantly covaries with the height or unevenness of that terrain  
358 patch. Post-hoc pairwise comparisons, where relevant, are performed using the `emmeans` package  
359 in RStudio with p-values adjusted according to Tukey's method.

360 A measure of central tendency or variability within a trial is the dependent variable  $y$  for the  
361 first linear mixed model. There are 27 observations for the dependent variable  $y$  corresponding to  
362 each trial (9 subjects running on 3 terrain). Terrain is the fixed factor and subjects are random  
363 factors in the model given by,

$$364 \quad y_{ij} = (\beta_0 + \mu_j) + \beta_i \text{terrain}_i + \epsilon_{ij}, \quad (10)$$

365 where  $i = 1, 2$  and  $j = 1 \dots 9$ . The intercept  $\beta_0$  (value of  $y$  on flat terrain) and parameters  $\beta_i$  for  
366 uneven I and uneven II are estimated for this model. The random factor variables  $\mu_j$  are assumed  
367 to be normally distributed about zero and account for inter-subject variability of the intercept.  
368 The model residuals are  $\epsilon_{ij}$  which are also assumed to be normally distributed about zero.

369 The second linear mixed model uses stepwise data where each step is grouped by subject and  
370 terrain type. Each of the 1086 steps in this dataset contains a value for subject number, terrain  
371 type, touchdown leg angle, decelerating fore-aft impulse, and forward foot speed at touchdown.  
372 The linear model for the dependent variable  $y$  (touchdown leg angle or fore-aft impulse) is,

$$373 \quad y_{ij} = (\beta_0 + \mu_{1j}) + \beta_i \text{terrain}_i + (\beta_f + \mu_{2j} + \nu_i) \text{footspeed} + \epsilon_{ij} \quad (11)$$

374 where  $i = 1, 2$  and  $j = 1 \dots 9$ . Like in equation (10), the model estimates the intercept  $\beta_0$ , i.e.  
375 the value of  $y$  on flat terrain when foot speed = 0,  $\beta_i$  for terrain factor, and the slope  $\beta_f$  for the  
376 dependence of  $y$  on forward foot speed at touchdown. The variable  $\mu_{1j}$  account for inter-subject  
377 variability of the intercept, and the variables  $\mu_{2j}$  and  $\nu_i$  account for inter-subject and terrain-specific  
378 variability of the slope  $\beta_f$ , respectively. The residuals  $\epsilon_{ij}$  are assumed to be normally distributed.

379 Using a dataset of 5262 steps from all subjects on uneven I and uneven II, we extract 1515  
380 landing probabilities (as detailed in section 2.2.2). To test whether runners aimed for terrain  
381 regions with low unevenness, we use a linear mixed model of the form,

$$382 \quad y_{kl} = (\mu_{1l} + \nu_{1k}) + (\mu_{2l} + \nu_{1k}) \text{terr} + \epsilon_{kl} \quad (12)$$

383 where  $k = 1, 2$  for the two uneven terrain and  $l = 1 \rightarrow 9$  for the 9 subjects. The dependent variable  
384  $y$  is the probability of landing in a foot-sized cell  $p_{i,j}$  and the independent variable ‘terr’ refers to the

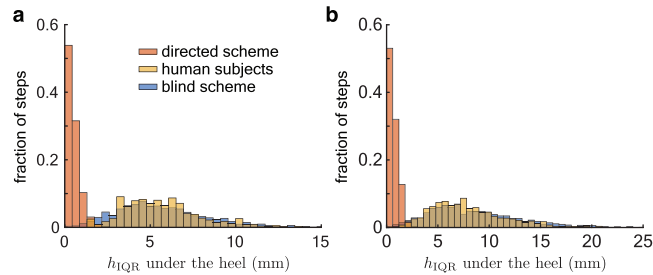

**Fig. 5. Foot placement on uneven terrain.** Histogram of the interquartile range of heights ( $h_{IQR}$ ) at footstep locations for the directed sampling scheme (red), experiments (yellow), and the blind sampling scheme (blue) on **a**, uneven I (2526 footsteps) and **b**, uneven II (2736 footsteps). Note that  $h_{IQR}$  varies over a greater range on uneven II.

385 median terrain height of the cell or the interquartile range of heights within the cell. The variables  
386  $\mu_{1l}$  accounts for subject-specific variability in the terrain-specific intercept  $\nu_{1k}$ . The variables  $\mu_{2l}$   
387 accounts for subject-specific variability in the terrain-specific slope  $\nu_{2k}$ .

388 **Nondimensionalization:** Following Alexander and Jayes (1983), we express lengths in units of leg  
389 length  $\ell$  and speed in units of  $\sqrt{g\ell}$ , where  $g$  is acceleration due to gravity. Statistically significant  
390 post-hoc comparisons are additionally reported in dimensional units using  $g = 9.81 \text{ m/s}^2$ , and the  
391 mean of the measurements across subjects, namely,  $\ell = 0.89 \text{ m}$  and  $m = 66.1 \text{ kg}$ .

## 392 Results

### 393 Foot placement on uneven terrain

394 To test whether real runners prefer to land on flatter patches, the measured footsteps were compared  
395 against two extreme models, a null hypothesis of a *blind* runner and an alternative hypothesis of a  
396 *directed* runner whose footsteps are selectively aimed at level parts of the terrain. The blind scheme  
397 uses a uniform random sample of rear-foot sized patches of the terrain to obtain statistics of the  
398 terrain at landing locations. The directed scheme preferentially samples more level patches using  
399 a Markov chain Monte Carlo (MCMC) model (methods 2.2.1).

400 The experimentally measured stepping patterns are the same as the blind scheme on both  
401 uneven I and II in terms of the terrain unevenness as quantified by  $h_{IQR}$  (human subjects versus  
402 blind scheme in Fig. 5). However, the directed scheme finds substantially more level landing patches,  
403 showing that it was possible for the runners to land on more level ground (directed scheme in Fig. 5).  
404 These trends are also borne out in a subject-wise analysis (Fig. 5—figure supplements 1, 2).

405 The directed scheme found more level patches and exhibited decreased variability in step length  
406 and step width compared with the experimental data. The mean step length and width of the  
407 directed scheme are the same as the experimental data on both uneven I and uneven II. However,  
408 the standard deviation of step length decreased by 80% on both uneven I and uneven II compared  
409 to experimental measurements. This corresponds to a change of 0.013 m and 0.011 m for the mean  
410 subject on uneven I and uneven II, respectively. The standard deviation of step width for the  
411 directed scheme decreased by 80% (0.0006 m) on uneven I and by 84% (0.005 m) on uneven II  
412 compared to experimental measurements.

413 The overall statistics of the terrain location at foot landing may obscure step-to-step dependence  
414 of the foot landing on terrain features. A second analysis of correlating foot landing probability  $p_{i,j}$   
415 with the interquartile range of the terrain heights in the foot-sized cell was consistent with results  
416 described above and showed no significance (Table 1). Taken together, these results indicate that  
417 the runners did not guide their footsteps towards flatter areas of the terrain.

**Table 1. Correlation between landing probability and terrain unevenness.** Details of the ANCOVAs on the linear mixed models from equation (12) showing denominator degrees of freedom, F-values, and p-values from the dataset of stepping probabilities and terrain height statistics of 1515 recorded  $p_{i,j}$  values for all subjects on uneven I and uneven II. Since the foot placement index  $p_{i,j}$  values show very little variability (Table 1—figure supplement 1), the model with the median terrain height was singular.

| independent variable | DenDF | F-value | p-value |
|----------------------|-------|---------|---------|
| IQR terrain height   | 20.6  | 3.03    | 0.10    |

## 418 **Fore-aft impulses**

419 The fore-aft ground reaction force in stance initially decelerates the center of mass before acceler-  
420 ating it forward (Fig. 6a). We find that less than  $6 \pm 1\%$  (mean  $\pm$  S.D.) of the forward momentum  
421 is lost during the deceleration phase of stance and there is no dependence on terrain or subject  
422 (Fig. 6b). The low variability of the fore-aft impulse, just 1% of the forward momentum, suggests  
423 that it is tightly regulated across runners, terrain and steps.

424 The regulation of foot speed is unlikely to be the primary determinant of the low variability in  
425 the collision impulse. This is because the dimensionless forward foot speed at touchdown across  
426 all terrain varied by nearly 50% of its mean ( $0.4 \pm 0.2$ , Fig. 7—table supplement 1), whereas

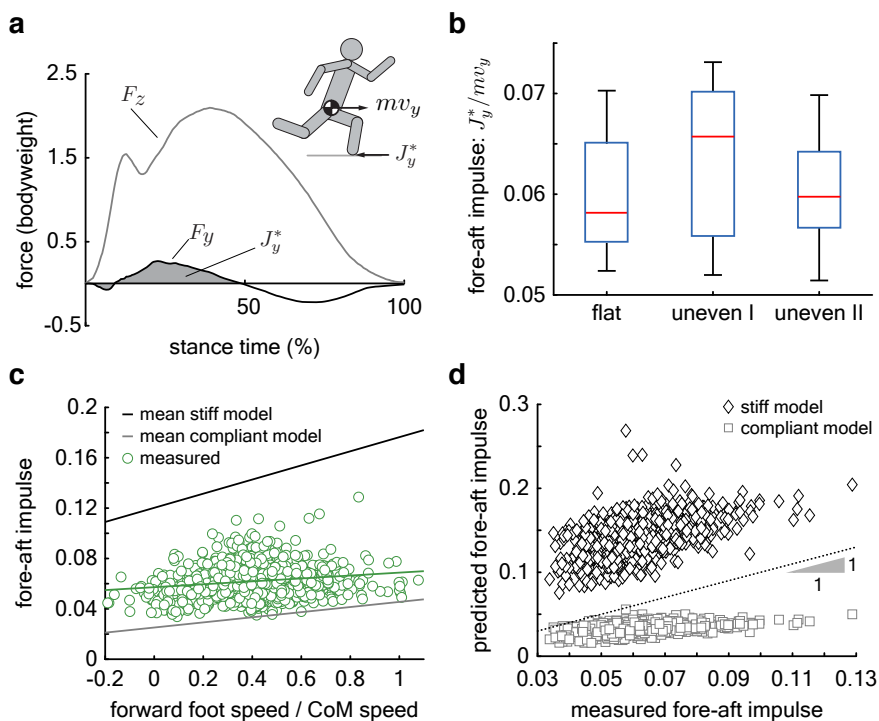

**Fig. 6. Regulation of fore-aft impulses.** **a**, The fore-aft impulse  $J_y^*$  (gray shaded area) is found by integrating the measured fore-aft ground reaction force  $F_y$  (black curve) during the deceleration phase. **b**, Mean  $\frac{J_y^*}{mv_y}$ . **c**, Measured  $\frac{J_y^*}{mv_y}$  (green circles) versus relative forward foot speed at landing (forward foot speed/center of mass speed) for each step recorded on all terrain types (total 1081 steps). The green line is the regression fit for the data. The dark and light gray lines are the predicted fore-aft impulse for the mean stiff and compliant jointed models, respectively. Per step model predictions in Fig. 6—figure supplement 1. **d**, Measured versus predicted fore-aft impulses for every step. The dotted line represents perfect prediction.

427 fore-aft collision impulses varied only by 17% of its mean. A statistical analysis lends further  
 428 support and shows that the dimensionless fore-aft impulse depends significantly, but only weakly,  
 429 on the dimensionless forward foot speed at landing (Fig. 6—table supplement 1,  $p = 0.001$ , slope  
 430  $= 0.01 \pm 0.003$ ).

431 To further investigate this weak dependence of the retarding impulse on foot speed, we analyzed  
 432 the mechanics of foot landing and the resultant impulse using a four-link chain model of the leg and  
 433 torso. The joints are either completely rigid or infinitely compliant when the foot undergoes a rigid,  
 434 inelastic collision with the ground (methods 2.3). The models at the two extremes of joint stiffness  
 435 bound the experimental data, with the compliant model underestimating the measured fore-aft  
 436 impulse while the stiff model overestimates it (Fig. 6 c, d, and Fig. 6—figure supplement 1). This  
 437 is expected because the muscle contraction needed for weight support and propulsion would induce

438 non-zero but non-infinite stiffness at the joints. Although both models overestimate the dependence  
439 of the fore-aft impulse on foot speed, the slope of the compliant model is closest to the measurements  
440 (Fig. 6c, Fig. 6—figure supplement 1). The slope of measured speed-impulse data is  $0.01 \pm 0.003$   
441 ( $p = 0.001$ , Fig. 6—table supplement 1), closer to compliant model than the stiff model, whose  
442 slopes are  $0.0203 \pm 0.010$  ( $p < 0.0001$ ) and  $0.056 \pm 0.005$  ( $p < 0.0001$ ), respectively. The measured  
443 fore-aft impulse for most steps was below 0.07 (whiskers extend to 1.5 times the interquartile  
444 range in Fig. 6b). The compliant model's predicted fore-aft impulses show good agreement with  
445 measurements when the impulse is below 0.07 (measured versus predicted in Fig. 6d), and disagree  
446 only for the occasional steps when runners experience more severe fore-aft impulses. Unlike the  
447 compliant model, the stiff model consistently over-estimates the measured fore-aft impulse over its  
448 entire range. Thus, we propose that maintaining low joint stiffness at landing helps maintain low  
449 fore-aft impulses despite variations in touchdown foot speed.

#### 450 **Leg retraction**

451 Increased leg retraction rate results in reduced forward foot speed at touchdown, thereby altering  
452 the fore-aft impulse (Karszen et al., 2015; Dhawale et al., 2019). The mean non-dimensional forward  
453 foot speed at landing is terrain-dependent and lower by  $0.17 \pm 0.04$  ( $p = 0.001$ ) on uneven I compared  
454 to flat ground, and by  $0.15 \pm 0.04$  ( $p = 0.002$ ) on uneven II compared to flat ground (Fig. 7a, Fig. 7—  
455 table supplement 1). For the mean subject, these correspond to reductions in forward foot speed  
456 of  $0.48 \pm 0.11$  m/s on uneven I and  $0.42 \pm 0.11$  m/s on uneven II compared to flat ground.

457 We find that touchdown angle depends significantly but only weakly on forward foot speed at  
458 landing ( $p \approx 0$ , slope =  $0.07 \pm 0.01$  rad, Fig. 6—table supplement 1). If the dimensionless forward  
459 foot speed at landing varied through its entire observed range from  $-0.2$  to  $1.1$ , it would result in  
460 a change in landing angle of  $0.08$  rad or  $5^\circ$ .

#### 461 **Stepping kinematics**

462 We find that the median non-dimensional step width is terrain dependent (Fig. 7b, Fig. 7—table  
463 supplement 1) and increased on uneven II versus flat ground by  $0.004 \pm 0.001$  ( $p = 0.03$ ). Step  
464 width variability, i.e. the interquartile range of step widths within a trial, is also terrain dependent  
465 ( $p = 0.05$ , Fig. 7c, Fig. 7—table supplement 1) and greater on uneven II versus level ground by  
466  $0.005 \pm 0.002$  ( $p = 0.04$ ). For the mean subject, median step width increased by  $4 \pm 1$  mm and the



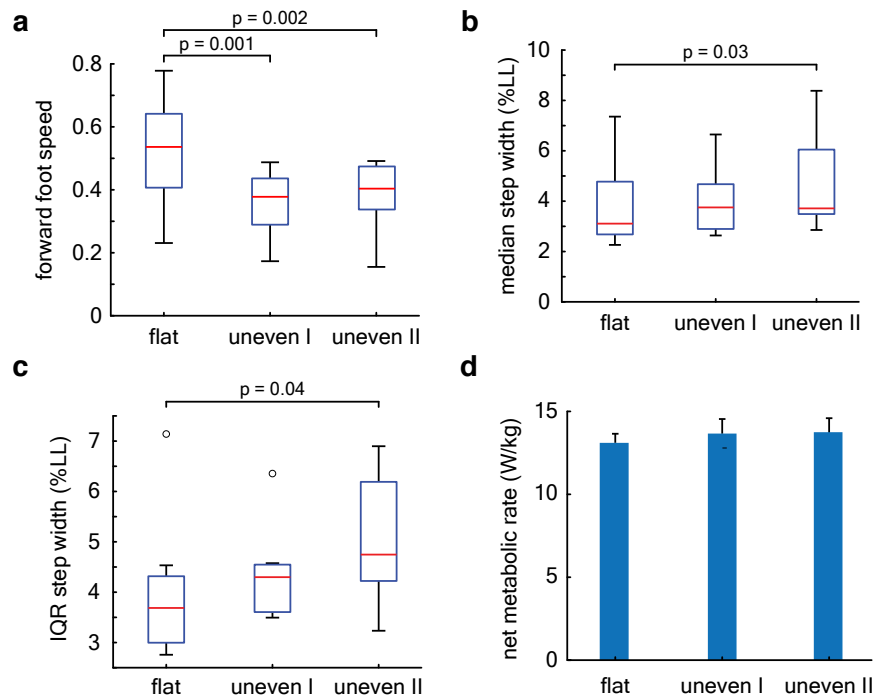

**Fig. 7. Energetics and stepping kinematics.** **a**, Box plot of the mean forward foot speed at landing (units of froude number). **b**, Box plot of the median step width (normalized to leg length). **c**, Box plot of the step width variability. Central red lines denote the median, boxes represent the interquartile range, whiskers extend to 1.5 times the quartile range, and open circles denote outliers. The distribution of step widths within a trial deviated from normality and hence we report the median and the interquartile range of the distribution for each trial (Fig. 7—figure supplement 1), instead of the mean and standard deviation as is reported for all other variables. **d**, Net metabolic rate normalized to subject mass. Whiskers represent standard deviation across subjects.

467 step width variability (IQR) increased by  $6 \pm 2$  mm.

## 468 **Energetics**

469 The approximately 5% increase in metabolic power consumption on the uneven terrain compared  
470 to flat we measured was not statistically significant ( $p = 0.08$ , Fig. 7d, Fig. 7—table supplement 1).

## 471 **Discussion**

472 Our primary finding is that runners do not use visual information about terrain unevenness to guide  
473 their footsteps. In addition, the fore-aft collisions that they experience seem almost decoupled from  
474 the forward speed with which their foot lands on the ground. Based on the modeling estimate  
475 of collisional impulses and comparison with measurements, we propose that low joint stiffness  
476 underlie the regulation of fore-aft impulses, likely contributing to stability (Dhawale et al., 2019).  
477 Taken together, these results suggest that runners rely not on vision-based path planning, but  
478 on their body's passive mechanical response for remaining stable on undulating uneven terrain.  
479 Additionally, the changes in step-width kinematics on the uneven versus flat terrain may reflect  
480 sensory feedback mediated stepping strategies similar to those reported previously (Seipel and  
481 Holmes, 2005; Seethapathi and Srinivasan, 2019), but more work is needed to investigate whether  
482 the differences were the result of feedback control or simply the result of variability injected by the  
483 terrain's unevenness.

484 Measurements of fore-aft impulses have not been previously examined in the context of stability.  
485 A previous theoretical analysis hypothesized that reducing tangential collisions and maintaining low  
486 fore-aft impulses reduces the risk of falling by tumbling in the sagittal-plane (Dhawale et al., 2019).  
487 Our data are consistent with this model. We find that only  $6 \pm 1\%$  of the forward momentum was  
488 lost in stance although the forward foot speed at landing varied by nearly 50%. This reduction  
489 in variability is surprising because, all else held the same, speed and impulse are expected to be  
490 linearly related. This suggests that the fore-aft impulse is tightly regulated by other means. By  
491 examining the role of leg joint compliance using model-based analyses of the data, we found that  
492 the measured fore-aft impulses were partly consistent with an idealized extreme of zero stiffness  
493 in the joints at the point of landing. However, joint stiffness in a real runner cannot be too small  
494 because it is needed to withstand the torques for weight support and propulsion. Thus, we propose

495 that the low variability in fore-aft impulses arises from active regulation of joint stiffness.

496 Past studies on running birds (Blum et al., 2014; Birn-Jeffery et al., 2014) provide some hints on  
497 why leg compliance, and not foot speed, might be the preferred means to regulate fore-aft impulses.  
498 To deal with abrupt changes in terrain height, running birds regulate foot speed and leg retraction  
499 rates to maintain consistent leg forces and reduce discomfort or injury risk. Although our terrain  
500 has smoothly varying terrain and not the step-like blocks used in the bird studies, our runners  
501 may still have encountered sudden height changes because they did not precisely regulate their  
502 stepping pattern to avoid uneven terrain areas. Like the running birds, they may have regulated  
503 foot speed to mitigate discomfort and high forces. Thus, by employing leg compliance to reduce  
504 the fore-aft impulse, the runners could deal with stability independent of foot speed regulation for  
505 safety and comfort. However, caution is warranted when comparing our results with these past  
506 studies. The bird studies used SLIP models to interpret their findings, but such models are energy  
507 conserving and unaffected by slope variations that were part of our terrain design. Furthermore,  
508 the peak-to-peak height variation of our terrain was less than 6% of the leg length, Blum et al.  
509 (2014) and Birn-Jeffery et al. (2014) used larger step-like obstacles of 10% leg length or more. For  
510 example, we see no change in the variability of the leg landing angle between flat and uneven terrain  
511 trials (Fig. 7—table supplement 1), which is expected if leg landing angle responded to variations  
512 in terrain height (Blum et al., 2014; Birn-Jeffery et al., 2014). So large step-like obstacles probably  
513 induce different swing-leg control strategies compared with undulating terrain with smaller height  
514 variations.

515 We found variability in step-to-step kinematics that are largely consistent with previous studies  
516 on step-like terrain, but with some notable differences. Studies of running birds hypothesize that  
517 crouched postures could aid stability on uneven terrain (Blum et al., 2011; Birn-Jeffery and Daley,  
518 2012), as do human-subject data from treadmill running (Voloshina and Ferris, 2015). We find  
519 a slight decrease in the virtual leg length at touchdown on the most uneven terrain compared to  
520 flat, but the difference was only around 1% of the leg length (Fig. 7—table supplement 1), whose  
521 effect on stability would be negligible. We find higher leg retraction rates on uneven terrain, as  
522 also reported in running birds (Birn-Jeffery and Daley, 2012; Blum et al., 2014). Leg retraction  
523 has been hypothesized to improve running stability in the context of point-mass models by altering  
524 leg touchdown angle to aid stability (Seyfarth et al., 2003; Blum et al., 2010). However, we find

525 only a weak dependence between leg retraction rate and leg touchdown angles. Human-subject  
526 treadmill experiments report that step width and step length variability increased by 27% and  
527 26%, respectively, and mean step length or step width were the same for flat and uneven terrain  
528 (Voloshina and Ferris, 2015). Like those studies, we find 24% greater step width variability on  
529 uneven terrain compared to flat, but no significant changes in step length variability (Fig. 7b,  
530 Fig. 7—table supplement 1). We additionally find that the median step width increased on uneven  
531 terrain by 13%. The increase in median step width that we measure could be due to lateral stability  
532 challenges of running on relatively more complex terrain with smoothly varying slope and height  
533 variations in all directions.

534 Unlike treadmill running studies, we do not find a statistically significant increase in metabolic  
535 power consumption on uneven terrain versus flat ground, but the mean increase of around 5%  
536 is similar to Voloshina and Ferris (2015). The acceleration and deceleration when subjects turn  
537 around during our overground trials could affect the metabolic energy expenditure. Therefore, cau-  
538 tion is warranted in comparing the absolute value of our reported energetics data with other studies  
539 on treadmills or unidirectional running. But several aspects of the experimental design allow us to  
540 compare the respirometry data between the different terrain types. For every subject, we ensured  
541 that the breath-by-breath respirometry data stabilized within the first 3 minutes and only used the  
542 stabilized value for further analyses (Methods 2.1.4). If the transients had dominated the respirom-  
543 etry measurements, the measurements would not have stabilized (Fig. 7—figure supplement 2).  
544 The use of the moving light bar on either side of the track ensured that the subjects maintained  
545 the same speed on all the terrain types. Moreover, the turnaround patches were designed to have  
546 the same terrain statistics (flat, uneven I, uneven II) as the rest of the track, thus ensuring that  
547 there were no abrupt terrain transitions. This allowed us to control for and mitigate the effects of  
548 the turnaround phases when comparing the results between the different terrain types.

549 We find no evidence that subjects used visual information from the terrain geometry to plan  
550 footsteps despite predicted advantages to stability (Dhawale et al., 2019). This finding differs  
551 from walking studies that highlight the role of vision in guiding step placement on natural, uneven  
552 terrain (Matthis et al., 2018; Bonnen et al., 2021). The stochastic stepping model was able to  
553 consistently find landing locations with lower unevenness than the human subjects, while matching  
554 the measured mean stepping statistics and even reducing step-to-step variability, thus showing that

555 the absence of a foot placement strategy was not due to a lack of feasible landing locations. We  
556 speculate that foot placement strategies are used for obstacle avoidance (Matthis and Fajen, 2014)  
557 on more complex terrain while our terrains were designed to be continuously undulating and not  
558 have large, singular obstacles. While our data suggest that terrain-guided foot placement strategies  
559 are not required for stability on gently undulating terrain, it leaves open the possibility that there  
560 is a skill-learning component to such foot placement strategies which we could not measure since  
561 our volunteers were not experienced trail runners. Further experiments with runners of varying  
562 skill levels could such a hypothesis.

### 563 **Conclusions**

564 Footsteps were not directed towards flatter regions of the terrain despite predicted benefits to  
565 stability. Instead, we found evidence for a previously uncharacterized control strategy, namely that  
566 the body's stabilizing mechanical response due to low fore-aft impulses was used to mitigate the  
567 destabilizing effects of stepping on uneven areas. The limited need for visual attention may explain  
568 how runners could employ vision for other functional goals, such as planning a path around large  
569 obstacles, or in an evolutionary context, tracking footprints to hunt prey on uneven terrain without  
570 falling. Whether other animals employ similar strategies on uneven terrain is presently unknown  
571 but data from galloping dogs show that they do not alter their gait on uneven terrain (Wilshin et al.,  
572 2020), thus suggesting that other adept runners potentially employ similar principles for stability.  
573 We propose that our results could translate to new strategies for reducing the real-time image  
574 processing burden in robotic systems, and could also help in training trail runners by emphasizing  
575 limber joints when dealing with uneven terrain.

576 **Data availability statement:** All data points are plotted in either the main text or the electronic  
577 supplementary material. Raw data are available on the Dryad repository associated with this paper.

578 **Author Contributions:** MV conceived the study. ND conducted the experiment. ND and MV  
579 performed the data analysis and wrote the paper.

580 **Acknowledgements:** Human Frontier Science Program and Wellcome Trust-DBT Alliance for  
581 funding.

582 **Author Declaration:** That authors declare that they have no conflict of interest.

## References

- Alexander R, Jayes A. A dynamic similarity hypothesis for the gaits of quadrupedal mammals. *Journal of zoology*. 1983; 201(1):135–152.
- Arellano CJ, Kram R. The effects of step width and arm swing on energetic cost and lateral balance during running. *Journal of biomechanics*. 2011; 44(7):1291–1295.
- Birn-Jeffery AV, Daley MA. Birds achieve high robustness in uneven terrain through active control of landing conditions. *Journal of Experimental Biology*. 2012; 215(12):2117–2127.
- Birn-Jeffery AV, Hubicki CM, Blum Y, Renjewski D, Hurst JW, Daley MA. Don't break a leg: running birds from quail to ostrich prioritise leg safety and economy on uneven terrain. *Journal of Experimental Biology*. 2014; 217(21):3786–3796.
- Blum Y, Lipfert S, Rummel J, Seyfarth A. Swing leg control in human running. *Bioinspiration & biomimetics*. 2010; 5(2):026006.
- Blum Y, Birn-Jeffery A, Daley MA, Seyfarth A. Does a crouched leg posture enhance running stability and robustness? *Journal of Theoretical Biology*. 2011; 281(1):97–106.
- Blum Y, Vejdani HR, Birn-Jeffery AV, Hubicki CM, Hurst JW, Daley MA. Swing-leg trajectory of running guinea fowl suggests task-level priority of force regulation rather than disturbance rejection. *PloS one*. 2014; 9(6):e100399.
- Bonnen K, Matthis JS, Gibaldi A, Banks MS, Levi DM, Hayhoe M. Binocular vision and the control of foot placement during walking in natural terrain. *Scientific Reports*. 2021; 11(1):20881. <https://doi.org/10.1038/s41598-021-99846-0>, doi: 10.1038/s41598-021-99846-0.
- Bramble DM, Lieberman DE. Endurance running and the evolution of Homo. *Nature*. 2004; 432(7015):345–352. doi: 10.1038/nature03052.
- Brockway J. Derivation of formulae used to calculate energy expenditure in man. *Human nutrition Clinical nutrition*. 1987; 41(6):463–471.
- Carrier DR. The Energetic Paradox of Human Running and Hominid Evolution. *Current Anthropology*. 1984; 25(4).
- Chatterjee A, Ruina A. Two interpretations of rigidity in rigid-body collisions. *Journal of Applied Mechanics*. 1998; 65(4):894–900.
- Daley MA, Biewener AA. Running over rough terrain reveals limb control for intrinsic stability. *Proceedings of the National Academy of Sciences*. 2006; 103(42):15681–15686.
- Daley MA, Usherwood JR, Felix G, Biewener AA. Running over rough terrain: guinea fowl maintain dynamic stability despite a large unexpected change in substrate height. *Journal of Experimental Biology*. 2006; 209(1):171–187.
- Dempster WT. Space requirements of the seated operator, geometrical, kinematic, and mechanical aspects of the body with special reference to the limbs. Michigan State Univ East Lansing; 1955.
- Dhawale N, Mandre S, Venkadesan M. Dynamics and stability of running on rough terrains. *Royal Society Open Science*. 2019; 6(3):181729.
- Donelan JM, Kram R, Kuo AD. Mechanical and metabolic determinants of the preferred step width in human walking. *Proceedings of the Royal Society of London B: Biological Sciences*. 2001; 268(1480):1985–1992.
- Donelan JM, Kram R, Kuo AD. Mechanical work for step-to-step transitions is a major determinant of the metabolic cost of human walking. *Journal of Experimental Biology*. 2002; 205(23):3717–3727.
- Donelan JM, Shipman DW, Kram R, Kuo AD. Mechanical and metabolic requirements for active lateral stabilization in human walking. *Journal of biomechanics*. 2004; 37(6):827–835.

- Geyer H, Seyfarth A, Blickhan R. Compliant leg behaviour explains basic dynamics of walking and running. *Proceedings of the Royal Society B: Biological Sciences*. 2006; 273(1603):2861–2867.
- Holmes P, Full RJ, Koditschek D, Guckenheimer J. The dynamics of legged locomotion: Models, analyses, and challenges. *Siam Review*. 2006; 48(2):207–304.
- Karssen JD, Haberland M, Wisse M, Kim S. The effects of swing-leg retraction on running performance: analysis, simulation, and experiment. *Robotica*. 2015; 33(10):2137–2155.
- Kent JA, Sommerfeld JH, Mukherjee M, Takahashi KZ, Stergiou N. Locomotor patterns change over time during walking on an uneven surface. *Journal of Experimental Biology*. 2019 07; 222(14). <https://doi.org/10.1242/jeb.202093>, doi: 10.1242/jeb.202093, jeb202093.
- Kowalsky DB, Rebula JR, Ojeda LV, Adamczyk PG, Kuo AD. Human walking in the real world: Interactions between terrain type, gait parameters, and energy expenditure. *PloS one*. 2021; 16(1):e0228682.
- Kuznetsova A, Brockhoff PB, Christensen RHB. lmerTest Package: Tests in Linear Mixed Effects Models. *Journal of Statistical Software*. 2017; 82(13):1–26. doi: 10.18637/jss.v082.i13.
- Lee DN, Lishman R. Visual control of locomotion. *Scandinavian Journal of Psychology*. 1977; 18(1):224–230. doi: 10.1111/j.1467-9450.1977.tb00281.x.
- Lieberman DE, Venkadesan M, Werbel WA, Daoud AI, D'andrea S, Davis IS, Mang'Eni RO, Pitsiladis Y. Foot strike patterns and collision forces in habitually barefoot versus shod runners. *Nature*. 2010; 463(7280):531.
- Mahaki M, Bruijn S, Van Dieën J. The effect of external lateral stabilization on the use of foot placement to control mediolateral stability in walking and running. *PeerJ*. 2019; 7:e7939. doi: <https://doi.org/10.7717/peerj.7939>.
- Matthis JS, Fajen BR. Visual control of foot placement when walking over complex terrain. *Journal of experimental psychology: human perception and performance*. 2014; 40(1):106.
- Matthis JS, Yates JL, Hayhoe MM. Gaze and the Control of Foot Placement When Walking in Natural Terrain. *Curr Biol*. 2018 04; 28(8):1224–1233.e5. doi: 10.1016/j.cub.2018.03.008.
- Müller R, Birn-Jeffery A, Blum Y. Human and avian running on uneven ground: a model-based comparison. *Journal of The Royal Society Interface*. 2016; 13(122):20160529.
- Müller R, Häufle DFB, Blickhan R. Preparing the leg for ground contact in running: the contribution of feed-forward and visual feedback. *Journal of Experimental Biology*. 2015; 218(3):451–457.
- Ruina A, Bertram JE, Srinivasan M. A collisional model of the energetic cost of support work qualitatively explains leg sequencing in walking and galloping, pseudo-elastic leg behavior in running and the walk-to-run transition. *Journal of theoretical biology*. 2005; 237(2):170–192.
- Seethapathi N, Srinivasan M. Step-to-step variations in human running reveal how humans run without falling. *eLife*. 2019; 8:e38371.
- Seipel JE, Holmes P. Running in three dimensions: Analysis of a point-mass sprung-leg model. *The International Journal of Robotics Research*. 2005; 24(8):657–674.
- Seyfarth A, Geyer H, Günther M, Blickhan R. A movement criterion for running. *Journal of biomechanics*. 2002; 35(5):649–655.
- Seyfarth A, Geyer H, Herr H. Swing-leg retraction: a simple control model for stable running. *Journal of Experimental Biology*. 2003; 206(15):2547–2555.
- Srinivasan M, Ruina A. Computer optimization of a minimal biped model discovers walking and running. *Nature*. 2006; 439(7072):72–75.
- Thomas ND, Gardiner JD, Crompton RH, Lawson R. Keep your head down: Maintaining gait stability in challenging conditions. *Human Movement Science*. 2020; 73:102676.



- Venkadesan M, Mandre S, Bandi MM. Chapter 7.1 - Biological feet: Evolution, mechanics and applications. In: Sharbafi MA, Seyfarth A, editors. *Bioinspired Legged Locomotion* Butterworth-Heinemann; 2017.p. 461–486. doi: 10.1016/B978-0-12-803766-9.00010-5.
- Voloshina AS, Ferris DP. Biomechanics and energetics of running on uneven terrain. *Journal of Experimental Biology*. 2015; 218(5):711–719.
- Warren Jr WH, Young DS, Lee DN. Visual control of step length during running over irregular terrain. *Journal of Experimental Psychology: Human Perception and Performance*. 1986; 12(3):259.
- Wilshin S, Reeve MA, Spence AJ. Dog galloping on rough terrain exhibits similar limb co-ordination patterns and gait variability to that on flat terrain. *Bioinspiration & Biomimetics*. 2020 nov; 16(1):015001. <https://doi.org/10.1088/1748-3190/abb17a>, doi: 10.1088/1748-3190/abb17a.
